# Supplementary material
Source: Springer Nature journal article supplement (https://www.springermedizin.de/resource/supplementary/12958_2009_613_MOESM1_ESM.pdf/9568100)

M L1 L2 L3 L4 L5

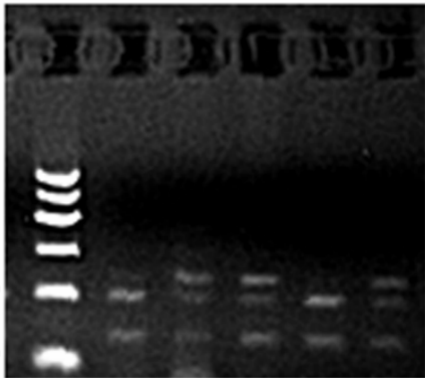

300bp -  
200bp -  
100bp -

Supplement: MOESM1 [file 9568100]
